# Supplementary material for: Vertical Al2Se3/MoSe2 heterojunction on sapphire synthesized using ion beam
Source: Royal Society of Chemistry journal article supplement (doi:10.1039/c6ra28273c), 2017-01-01
Supplement: c6ra28273c1.pdf [file c6ra28273c1.pdf]

## Supplementary Information

### Vertical Al<sub>2</sub>Se<sub>3</sub>/MoSe<sub>2</sub> Heterojunction on Sapphire Synthesized by Using Ion Beam

Hsu-Sheng Tsai<sup>1\*</sup>, Jhe-Wei Liou<sup>2</sup>, Yi-Chung Wang<sup>3</sup>, Chia-Wei Chen<sup>3</sup>, Yu-Lun Chueh<sup>3</sup>, Ching-Hung Hsiao<sup>3</sup>, Hao Ouyang<sup>3</sup>, Wei-Yen Woon<sup>2\*</sup>, Jenq-Horng Liang<sup>1,4\*</sup>

<sup>1</sup> Institute of Nuclear Engineering and Science, National Tsing Hua University, Hsinchu 30013, Taiwan, R.O.C.

<sup>2</sup> Department of Physics, National Central University, Jungli 32054, Taiwan, R.O.C.

<sup>3</sup> Department of Material Science and Engineering, National Tsing Hua University, Hsinchu 30013, Taiwan, R.O.C.

<sup>4</sup> Department of Engineering and System Science, National Tsing Hua University, Hsinchu 30013, Taiwan, R.O.C.

\*Correspondence to: b91520016@yahoo.com.tw, wywoon@phy.ncu.edu.tw and jhliang@ess.nthu.edu.tw

#### Calculations

In Fig. S2a, the length of the dashed line, which contains a quadruple reciprocal vector, is equal to 8.933 nm<sup>-1</sup>, so that the length of the reciprocal vector is 2.233 nm<sup>-1</sup>. The inverse of 2.233 nm<sup>-1</sup> is equal to 0.4478 nm that corresponds to the (011) interplanar distance (0.4587 nm) of Al<sub>2</sub>Se<sub>3</sub>. On the other hand, the length (16.591 nm<sup>-1</sup>) of the dashed line as shown in Fig. S2b contains a quadruple reciprocal vector. Hence, the length of the reciprocal vector is 4.148 nm<sup>-1</sup>. The inverse of 4.148 nm<sup>-1</sup> is equal to 0.241 nm that corresponds to the (400) interplanar distance (0.25 nm) of Al<sub>2</sub>Se<sub>3</sub>. These calculations, which derived from the experimental results, are in agreement with the theory and the error rate is less than 5%, indicating that the results are believable.

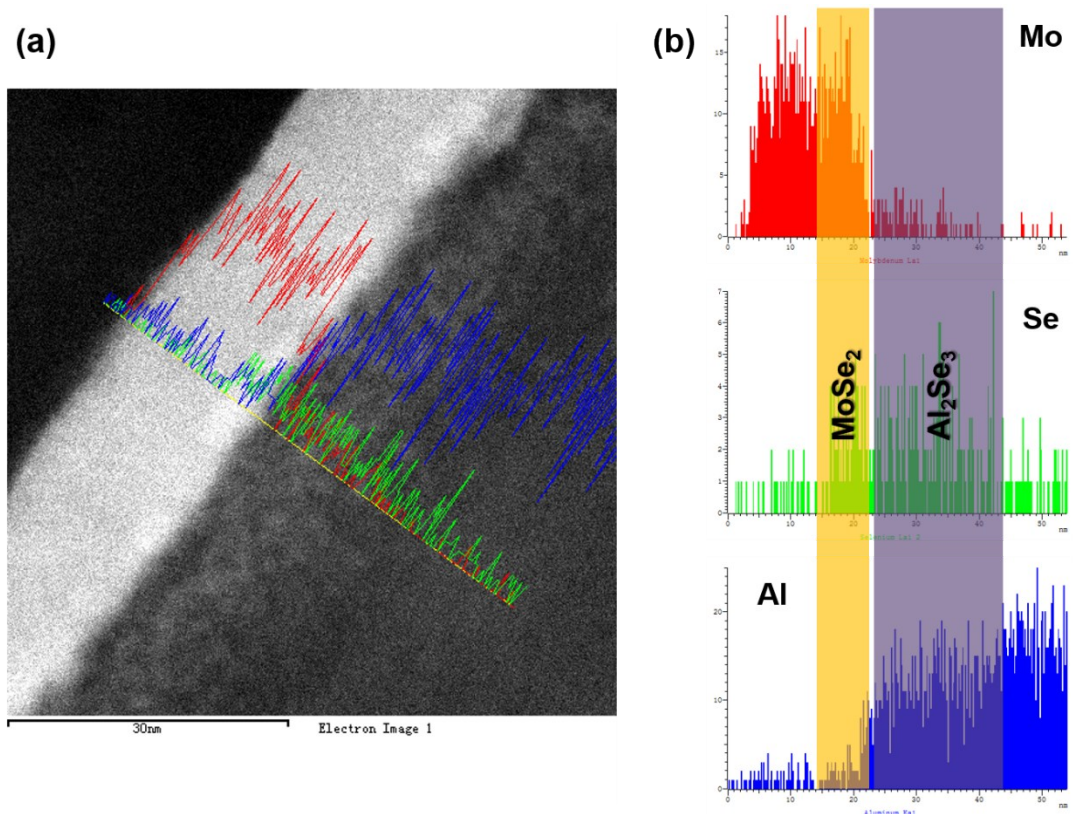

Fig. S1 (a) STEM dark-field image of the MoSe<sub>2</sub>/Al<sub>2</sub>Se<sub>3</sub>/sapphire layer structure. (b) Depth concentration distribution of Mo, Se, and Al.

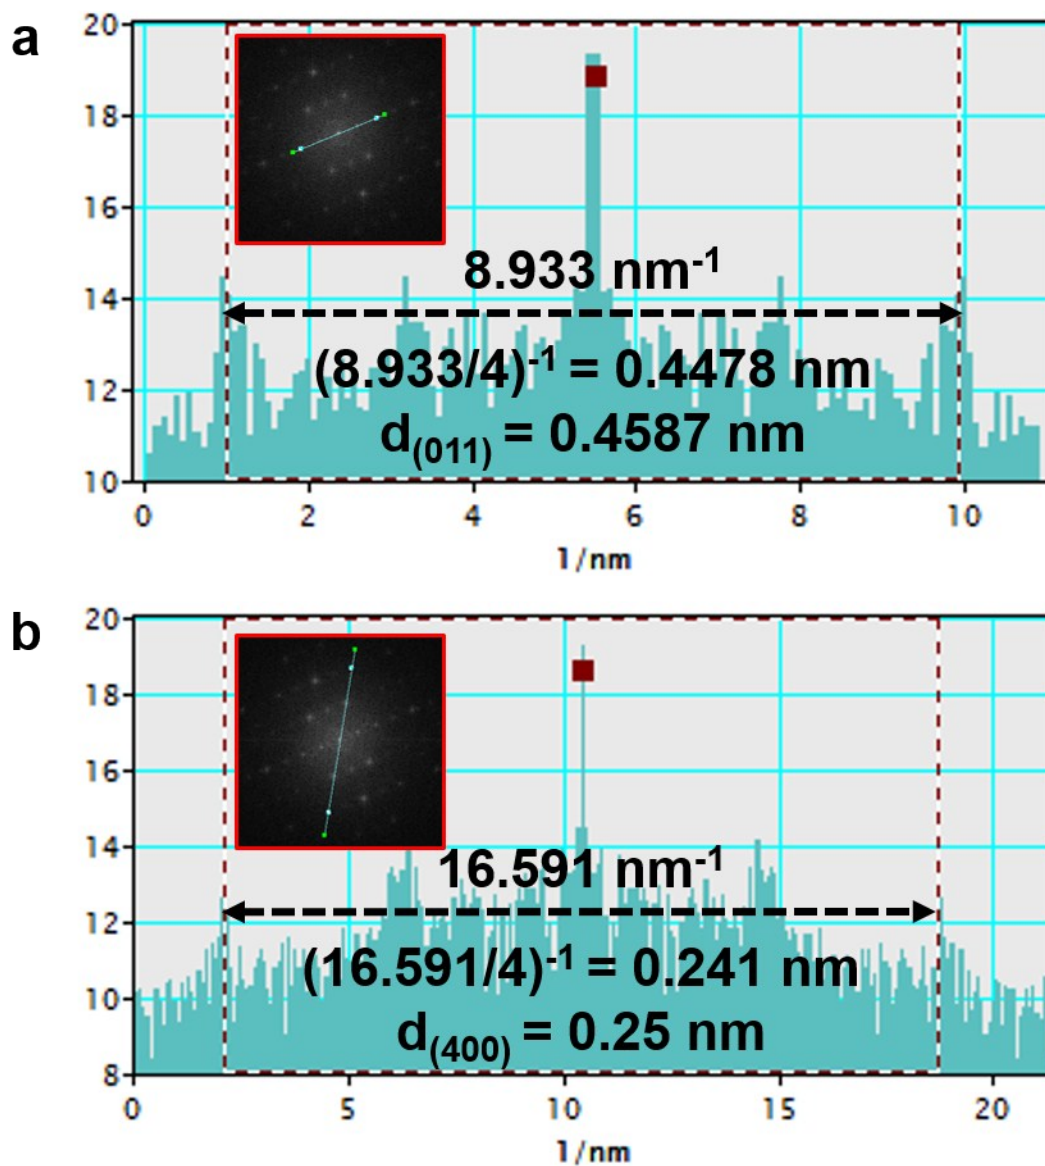

Fig. S2 (a) The distance between (011) reciprocal points of Al<sub>2</sub>Se<sub>3</sub>. (b) The distance between (400) reciprocal points of Al<sub>2</sub>Se<sub>3</sub>.

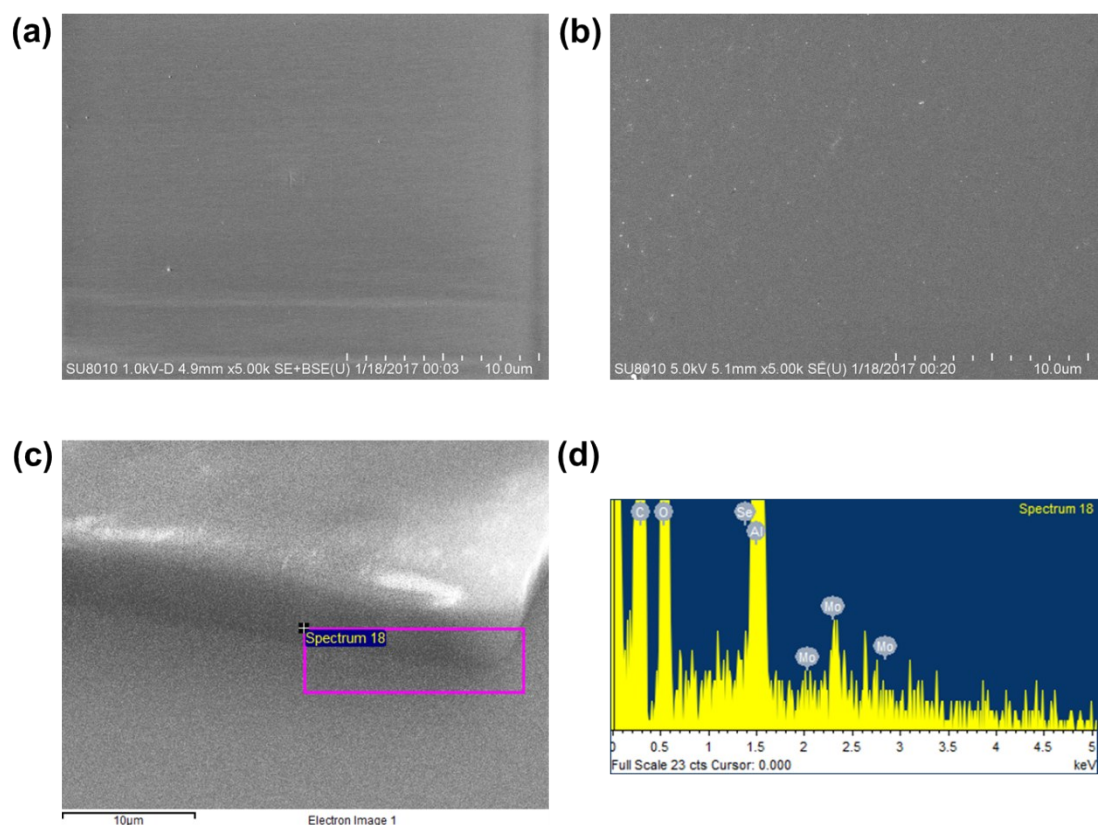

Fig. S3 (a) The top-view SEM image of pristine sapphire. (b) The top-view SEM image of Mo film on sapphire. (c) The tilt-view SEM image of the patterned  $\text{MoSe}_2/\text{Al}_2\text{Se}_3$  on sapphire. (d) The EDS spectrum of the area corresponding to the rectangle in (c).
